# Supplementary material for: Unusual Organization of I-BAR Proteins on Tubular and Vesicular Membranes
Source: PubMed Central journal article supplement — Biophys J. 2019 Jul 2;117(3):553–62. doi: 10.1016/j.bpj.2019.06.025 (PMC6697384; doi:10.1016/j.bpj.2019.06.025), 2019-07-02
Supplement: mmc1.pdf [file mmc1.pdf]

**Biophysical Journal, Volume 117**

**Supplemental Information**

**Unusual Organization of I-BAR Proteins on Tubular and Vesicular  
Membranes**

**Zack Jarin, Feng-Ching Tsai, Aram Davtyan, Alexander J. Pak, Patricia Bassereau, and Gregory A. Voth**

## Supporting Material for

### Unusual Organization of I-BAR Proteins on Tubular and Vesicular Membranes

Z Jarin, F-C Tsai, A Davtyan, A J Pak, P Bassereau, G A Voth

#### CG Model Details

The coarse-grained (CG) models used in this study were systematically parameterized from reference all-atom simulations. We first describe the atomistic simulations used, then the procedure to train and simulate the coarse-grained models.

##### *All-atom simulation details*

All-atom simulations of a single I-BAR domain of IRSp53 interacting with a fully solvated, periodic lipid bilayer were run using GROMACS (version 5.0) (1). Initially, a lipid bilayer composed of 75% 1,2-dioleoyl-sn-glycero-3-phosphocholine (DOPC), 20% 1,2-dioleoyl-sn-glycero-3-phosphoserine (DOPS), and 5% Phosphatidylinositol-4,5-diphosphate (PI(4,5)P<sub>2</sub>) was generated using the CHARMM-GUI and equilibrated using the CHARMM-GUI scheme of sequentially restrained simulations (2-6). Next, the I-BAR domain of IRSp53 (PDB: 2YKT(7)) was added to the membrane, and solvated with 150 mM NaCl using GROMACS tools (1). Production simulations were run at 298 K at 1 atm using a Nose-Hoover thermostat and the Parrinello-Rahman barostat implemented with corresponding 1 ps and 5.0 ps coupling constants in GROMACS (1, 8, 9). The CHARMM36 force-field was used in all simulations as well (10-12).

##### *CG model details*

A coarse-grained map of I-BAR domain of IRSp53 was created using Essential Dynamics Coarse-graining (ED-CG) using 24 beads per monomer (13). This number of beads was chosen to reproduce to maintain a similar resolution between the protein and lipid model, which has been thoroughly described ref (14). The ED-CG protocol generates a mapping dividing the protein along its primary sequence by minimizing the residual (shown in Eq. 1) describing the fluctuations between beads.

$$\chi^2 = \frac{1}{3N} \sum_{l=1}^N \frac{1}{n_t} \sum_{t=1}^{n_t} \left( \sum_{i \in l} \sum_{j \geq i \in l} |\Delta r_i^{ED}(t) - \Delta r_j^{ED}(t)|^2 \right) \quad (1)$$

where  $N$  is the number of CG sites,  $n_t$  is the number of configuration, and  $\Delta r_i^{ED}$  is the displacement from equilibrium of the  $i$ th CG site at configuration  $t$ . The protocol used here first maps each residue to the carbon-alpha atom of the residue backbone, then maps multiple carbon-alpha atoms to a single bead resulting in approximately 10 residues per bead. For example, the boundaries for the first bead are the first residue and the fourth residue i.e. the first three residues' carbon alphas map to the first bead. As a result of a steepest descent and simulated annealing minimization scheme, the residue boundaries between beads are as follows, 1<sup>st</sup>, 4<sup>th</sup>, 8<sup>th</sup>, 20<sup>th</sup>, 35<sup>th</sup>, 48<sup>th</sup>, 63<sup>rd</sup>, 77<sup>th</sup>, 90<sup>th</sup>, 105<sup>th</sup>, 114<sup>th</sup>, 127<sup>th</sup>, 138<sup>th</sup>, 147<sup>th</sup>, 152<sup>nd</sup>, 156<sup>th</sup>, 160<sup>th</sup>, 167<sup>th</sup>, 177<sup>th</sup>, 190<sup>th</sup>, 202<sup>nd</sup>, 216<sup>th</sup>, 226<sup>th</sup>, and 236<sup>th</sup>. The spacing is not regular as ED-CG optimizes these boundaries to maximally capture the atomistic fluctuations in the protein. The intraprotein interactions are parameterized using a hetero-elastic network model parameterized using the all-atom simulations (15). Parameters,  $k_{ij}$  and  $b_{ij}$  shown in Eq. 2, between each pair of CG protein beads are determined to reproduce the fluctuations

of the CG beads in the mapped all-atom trajectory. In Table 1, the intraprotein elastic network parameters are shown.

$$U_b(r_{ij}) = k_{ij}(r_{ij} - b_{ij})^2 \quad (2)$$

The interprotein and protein-lipid (nonbonded) interactions use a shifted-force 10-6 Lennard Jones potential defined below (16). Both interprotein and protein-lipid interactions used a sigma value of 1.5 nm, which was the most probable distance between mapped protein beads to the mapped lipid head groups. The nonbonded interaction cutoff was assumed to be  $2\sigma$ . The epsilon values of the protein-lipid interactions were investigated as described in the main document. The interprotein interactions were the repulsive portion of the protein-lipid interaction.

$$U_{NB} = U_{LJ}(r_{ij}) - U_{LJ}(r_c) - (r - r_c) F_{LJ}(r_c), \quad r < r_c \quad (3)$$

$$U_{LJ}(r_{ij}) = 4\epsilon \left[ \left( \frac{\sigma}{r_{ij}} \right)^{10} - \left( \frac{\sigma}{r_{ij}} \right)^6 \right] \quad \text{and} \quad F_{LJ}(r_{ij}) = -U'_{LJ}(r_{ij}) \quad (4)$$

The initial configurations for each system were created by placing lipids on equally spaced points in the desired geometry (e.g., cylinder) and equilibrating under zero membrane tension when applicable. Proteins were subsequently added to the equilibrated lipid bilayer system. CG simulations were run using the LAMMPS MD engine and the Langevin thermostat with temperature dampening parameter of 5000fs and Parrinello-Rahman barostat with pressure dampening parameter of 50,000fs (8, 17, 18). The timescale of the production simulations was at least 30 million steps with a coarse-grained timestep of 5 fs, but varied based on the geometry and the time required to converge order parameters statistics described in the main text.

### MesM-P Model Details

The MesM-P model leverages successes of the original MesM-P model with three major changes: no solvent, softer 10-2 Lennard-Jones potential, and shorter discretization length (19). We set the discretization of the membrane mesh to approximately 3 nm, based on the dimensions of the I-BAR domain of IRSp53 (7). Next, we parametrize the I-BAR domain model as a linear chain of MesM-P particles with varied radii. The protein-membrane interactions use a shifted-force 4-2 Lennard Jones potential similar to that shown above. In the protein-membrane interactions, we use values of sigma equal to 2.67, 2.90, and 3.12 nm and corresponding values of epsilon equal to 1.0, 1.25, and 1.5 kcal/mol, which capture the shape and aggregation behavior of the I-BAR domain as shown in the main text. The protein-protein interactions were the repulsive portion of the protein membrane interaction with the same varied sigma values to maintain the shape of the I-BAR domains.

The initial configurations for each system were made by placing membrane beads on a hexagonal lattice in the desired geometry and equilibrating under zero tension using the Langevin thermostat with temperature dampening parameter of 5000fs and Berendsen barostat with pressure dampening parameter of 50000fs. All systems ran for 5 million timesteps to converge order parameter statistics described in main text. The guiding potential used to generate the membrane bulge as described in the main text was a 325 nm spherical guiding potential slowly moved toward the membrane under zero tension. The spherical surface had a potential form of a 9-3 Lennard Jones similar to the potential shown in Equation 4 with a value of 1 kcal/mol.

## CG Protein-Protein Interactions

Thus far, we have assumed that the protein-protein interactions are purely repulsive, i.e., direct attraction between protein beads is not included. In reality, there would be some degree of protein-protein interaction. I-BAR domains are significantly charged proteins, which directly affects the membrane binding behavior. If each CG bead is assigned the mapped net charge, i.e., a simple charge mapping, we find a positively charge protein surface near the membrane and a positive high charge density near the ends of the I-BAR domains, as shown in Fig. S1A. The protein shown similarly to Figure 1A of the main text, and the membrane would lie directly below the I-BAR domain in this view. We note a positively charge protein surface near the membrane and the high charge density near the ends of the I-BAR domain. Additionally, there is a net +3 charge on a CG single bead, which in an atomistic resolution would be delocalized over several residues. In the absence of explicit solvent, we model screened electrostatic interactions between two I-BAR domains with a Yukawa potential with the unknown screening length,  $\kappa$ , shown in Equation 5.

$$V_{Yukawa}(r) = -\frac{q_1 q_2 e^{-\kappa r}}{4\pi\epsilon_0 r} \quad (5)$$

In the bulk, we could approximate the experimental screening length corresponding to 20 mM Tris pH 7.5, 60 mM NaCl and 100 mM sucrose buffer, but published studies(20, 21) have shown the effective ion concentration near the membrane is higher than in the bulk. We ran simulations using the possible screening lengths from near bulk ion concentration ( $\kappa = 0.15 \text{ \AA}^{-1}$ ) to  $\sim 10x$  increase in effective ion concentration ( $\kappa = 0.45 \text{ \AA}^{-1}$ ). We characterize these aggregates using the same order parameter analysis described in the main text and shown in panel B of Fig S1.

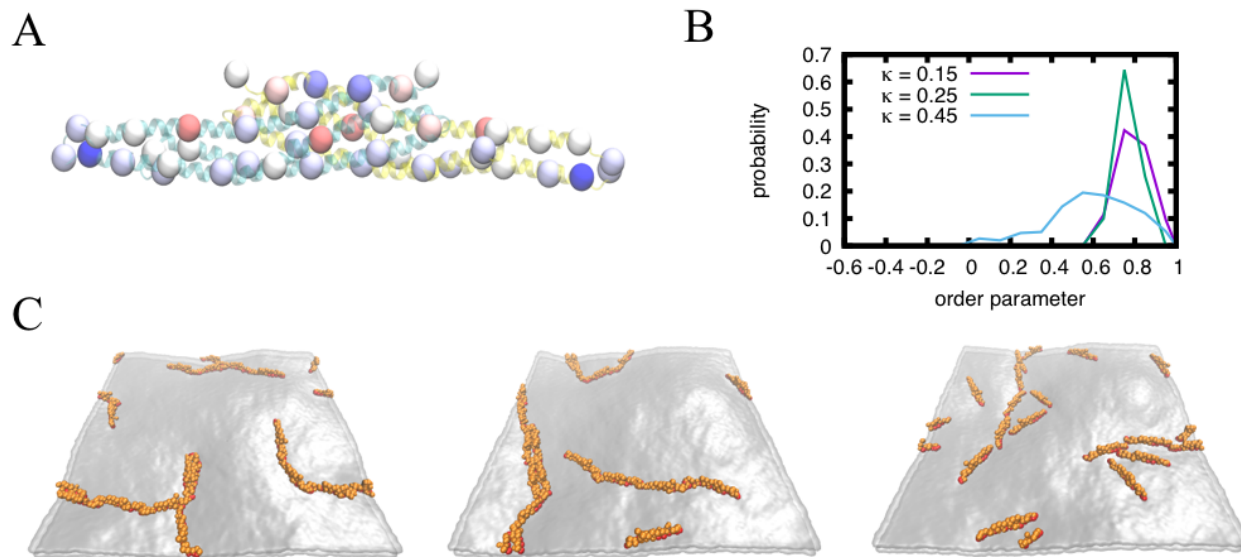

**Figure S1.** Charge distribution on CG model and snapshots of flat sheet configurations with screened electrostatic interactions. A) Side view of an overlay of the secondary structure of each monomer (cyan and yellow) and CG I-BAR domain colored by charge (+3 charge [blue], -2 [red]) B) probability distribution of inter-protein order parameter for varied screening lengths. C) snapshot of 10% coverage of a 100nm by 100nm flat at varied screening length:  $0.15 \text{ \AA}^{-1}$ ,  $0.25 \text{ \AA}^{-1}$ , and  $0.45 \text{ \AA}^{-1}$  from left to right.

As seen in panels B and C of Fig. S1, at low effective ion concentration ( $\kappa = 0.15 \text{ \AA}^{-1}$ ), the I-BAR domains begin to form bundled linear aggregates. This behavior is due to an overestimation of the protein-protein interactions because of the low effective salt concentration and the localization of charge on a single CG bead. At 3x bulk ion concentration ( $\kappa = 0.25 \text{ \AA}^{-1}$ ), I-BAR domains again form more unbundled linear aggregates with some additional side-to-side character, as additional I-BAR domains move to align opposite charges on the I-BAR domains. This behavior is expected at more reasonable bulk ion concentration. Finally, at 10x bulk ion concentration ( $\kappa = 0.45 \text{ \AA}^{-1}$ ), we find mostly linear aggregates again. Thus, when we model the electrostatic interactions between I-BAR domains in this way, we find that aggregation behavior qualitatively agrees with that from purely repulsive excluded volume protein interactions, which is to say that linear tip-to-tip aggregation is dominant and that this behavior is the result of an indirect membrane-mediated force.

**Table 1:** Heterogenous Elastic Network Model of CG I-BAR Domain. Indices 1-24 and 25-48 are each monomers of the I-BAR dimer.

| Bond index | I-BAR site i | I-BAR site j | $k_{ij}$ (kcal/mol/nm) | $b_i$ (nm) |
|------------|--------------|--------------|------------------------|------------|
| 1          | 1            | 2            | 0.157                  | 0.72067    |
| 2          | 1            | 3            | 0.051                  | 1.67476    |
| 3          | 1            | 4            | 0.035                  | 3.46783    |
| 4          | 1            | 5            | 0.025                  | 5.47033    |
| 5          | 1            | 9            | 0.022                  | 5.92131    |
| 6          | 1            | 10           | 0.026                  | 4.38529    |
| 7          | 1            | 11           | 0.037                  | 2.76665    |
| 8          | 1            | 12           | 0.932                  | 1.26606    |
| 9          | 1            | 13           | 0.038                  | 1.19113    |
| 10         | 1            | 14           | 0.006                  | 1.59165    |
| 11         | 1            | 15           | 0.004                  | 2.19398    |
| 12         | 1            | 16           | 0.006                  | 1.72454    |
| 13         | 1            | 17           | 0.008                  | 1.6926     |
| 14         | 1            | 18           | 0.726                  | 1.23483    |
| 15         | 1            | 19           | 0.849                  | 1.95313    |
| 16         | 1            | 20           | 0.042                  | 3.59278    |
| 17         | 1            | 21           | 0.031                  | 5.52169    |
| 18         | 1            | 30           | 0.024                  | 5.07338    |
| 19         | 1            | 31           | 0.034                  | 3.65461    |
| 20         | 1            | 32           | 0.026                  | 5.154      |
| 21         | 1            | 47           | 0.01                   | 4.80283    |
| 22         | 1            | 48           | 0.02                   | 3.94519    |
| 23         | 2            | 3            | 5.544                  | 1.28621    |
| 24         | 2            | 4            | 0.14                   | 3.19579    |
| 25         | 2            | 5            | 0.151                  | 5.18833    |
| 26         | 2            | 9            | 0.103                  | 5.62437    |
| 27         | 2            | 10           | 0.187                  | 4.18755    |
| 28         | 2            | 11           | 1.383                  | 2.70757    |
| 29         | 2            | 12           | 1.53                   | 1.46187    |
| 30         | 2            | 13           | 0.026                  | 1.73096    |
| 31         | 2            | 14           | 0.007                  | 2.0144     |
| 32         | 2            | 15           | 0.006                  | 2.49756    |
| 33         | 2            | 16           | 0.007                  | 1.80779    |
| 34         | 2            | 17           | 0.008                  | 1.81401    |
| 35         | 2            | 18           | 0.112                  | 1.25627    |

|    |   |    |         |         |
|----|---|----|---------|---------|
| 36 | 2 | 19 | 7.879   | 1.64888 |
| 37 | 2 | 20 | 0.278   | 3.23694 |
| 38 | 2 | 21 | 0.17    | 5.14485 |
| 39 | 2 | 30 | 0.078   | 4.68839 |
| 40 | 2 | 31 | 0.109   | 3.16253 |
| 41 | 2 | 32 | 0.071   | 4.68385 |
| 42 | 2 | 46 | 0.082   | 5.60502 |
| 43 | 2 | 47 | 0.034   | 4.34826 |
| 44 | 2 | 48 | 0.014   | 3.53817 |
| 45 | 3 | 4  | 0.904   | 1.96242 |
| 46 | 3 | 5  | 0.805   | 3.93522 |
| 47 | 3 | 9  | 0.332   | 4.34665 |
| 48 | 3 | 10 | 0.447   | 2.93438 |
| 49 | 3 | 11 | 22.021  | 1.63069 |
| 50 | 3 | 12 | 11.871  | 1.33705 |
| 51 | 3 | 13 | 0.623   | 2.63767 |
| 52 | 3 | 14 | 0.027   | 3.17265 |
| 53 | 3 | 15 | 0.008   | 3.66688 |
| 54 | 3 | 16 | 0.012   | 3.04643 |
| 55 | 3 | 17 | 0.042   | 2.9471  |
| 56 | 3 | 18 | 7.804   | 2.01619 |
| 57 | 3 | 19 | 45.888  | 0.93958 |
| 58 | 3 | 20 | 30.126  | 1.9864  |
| 59 | 3 | 21 | 0.566   | 3.89337 |
| 60 | 3 | 22 | 4.026   | 5.69693 |
| 61 | 3 | 29 | 10.535  | 5.58022 |
| 62 | 3 | 30 | 0.182   | 3.47394 |
| 63 | 3 | 31 | 0.142   | 2.002   |
| 64 | 3 | 32 | 0.133   | 3.49711 |
| 65 | 3 | 33 | 0.312   | 5.37109 |
| 66 | 3 | 45 | 0.518   | 5.86174 |
| 67 | 3 | 46 | 0.138   | 4.41816 |
| 68 | 3 | 47 | 0.049   | 3.20181 |
| 69 | 3 | 48 | 0.215   | 2.55673 |
| 70 | 4 | 5  | 105.148 | 2.01061 |
| 71 | 4 | 6  | 15.51   | 4.16504 |
| 72 | 4 | 7  | 1.539   | 5.93097 |
| 73 | 4 | 8  | 0.333   | 4.57014 |
| 74 | 4 | 9  | 1.063   | 2.63051 |
| 75 | 4 | 10 | 0.765   | 1.30486 |
| 76 | 4 | 11 | 30.53   | 1.37257 |
| 77 | 4 | 12 | 3.678   | 2.77714 |
| 78 | 4 | 13 | 0.084   | 4.3937  |
| 79 | 4 | 14 | 0.017   | 4.97111 |
| 80 | 4 | 15 | 0.004   | 5.41424 |
| 81 | 4 | 16 | 0.008   | 4.92109 |
| 82 | 4 | 17 | 0.051   | 4.88414 |
| 83 | 4 | 18 | 0.277   | 3.89841 |
| 84 | 4 | 19 | 0.396   | 2.37234 |
| 85 | 4 | 20 | 27.842  | 1.21186 |
| 86 | 4 | 21 | 9.762   | 2.45227 |
| 87 | 4 | 22 | 10.827  | 4.16281 |
| 88 | 4 | 23 | 0.466   | 5.38916 |
| 89 | 4 | 28 | 0.619   | 5.66204 |
| 90 | 4 | 29 | 3.837   | 3.68981 |
| 91 | 4 | 30 | 0.353   | 1.73921 |

|     |   |    |        |         |
|-----|---|----|--------|---------|
| 92  | 4 | 31 | 24.824 | 1.39215 |
| 93  | 4 | 32 | 0.664  | 2.15746 |
| 94  | 4 | 33 | 0.747  | 3.67121 |
| 95  | 4 | 34 | 0.29   | 5.08677 |
| 96  | 4 | 44 | 0.552  | 5.9     |
| 97  | 4 | 45 | 0.802  | 4.19729 |
| 98  | 4 | 46 | 0.472  | 3.13055 |
| 99  | 4 | 47 | 0.202  | 2.41756 |
| 100 | 4 | 48 | 0.005  | 2.54493 |
| 101 | 5 | 6  | 45.734 | 2.16872 |
| 102 | 5 | 7  | 19.259 | 3.97299 |
| 103 | 5 | 8  | 0.304  | 2.71107 |
| 104 | 5 | 9  | 56.299 | 1.15941 |
| 105 | 5 | 10 | 0.313  | 1.49844 |
| 106 | 5 | 11 | 0.191  | 3.03832 |
| 107 | 5 | 12 | 0.251  | 4.68577 |
| 108 | 5 | 18 | 0.674  | 5.82389 |
| 109 | 5 | 19 | 0.567  | 4.18314 |
| 110 | 5 | 20 | 1.119  | 2.38847 |
| 111 | 5 | 21 | 14.294 | 1.63264 |
| 112 | 5 | 22 | 14.076 | 2.64924 |
| 113 | 5 | 23 | 1.869  | 3.65635 |
| 114 | 5 | 24 | 0.724  | 4.8976  |
| 115 | 5 | 27 | 11.57  | 5.5464  |
| 116 | 5 | 28 | 2.268  | 3.68196 |
| 117 | 5 | 29 | 28.581 | 1.77545 |
| 118 | 5 | 30 | 75.667 | 1.02725 |
| 119 | 5 | 31 | 5.607  | 2.54644 |
| 120 | 5 | 32 | 3.063  | 1.77781 |
| 121 | 5 | 33 | 17.757 | 2.07866 |
| 122 | 5 | 34 | 0.802  | 3.25687 |
| 123 | 5 | 35 | 0.371  | 4.77998 |
| 124 | 5 | 43 | 13.979 | 5.84257 |
| 125 | 5 | 44 | 5.312  | 3.99099 |
| 126 | 5 | 45 | 0.675  | 2.51109 |
| 127 | 5 | 46 | 3.462  | 2.2726  |
| 128 | 5 | 47 | 6.301  | 2.6014  |
| 129 | 5 | 48 | 0.004  | 3.47228 |
| 130 | 6 | 7  | 42.079 | 1.84228 |
| 131 | 6 | 8  | 30.511 | 1.01613 |
| 132 | 6 | 9  | 3.442  | 1.94137 |
| 133 | 6 | 10 | 0.913  | 3.40658 |
| 134 | 6 | 11 | 5.248  | 5.09948 |
| 135 | 6 | 20 | 1.263  | 4.29271 |
| 136 | 6 | 21 | 7.913  | 2.6483  |
| 137 | 6 | 22 | 9.276  | 1.8981  |
| 138 | 6 | 23 | 8.22   | 2.08001 |
| 139 | 6 | 24 | 0.509  | 2.97419 |
| 140 | 6 | 25 | 0.001  | 4.24468 |
| 141 | 6 | 26 | 0.007  | 3.96905 |
| 142 | 6 | 27 | 0.157  | 3.42931 |
| 143 | 6 | 28 | 0.305  | 1.72271 |
| 144 | 6 | 29 | 69.728 | 1.04588 |
| 145 | 6 | 30 | 2.679  | 2.78135 |
| 146 | 6 | 31 | 0.5    | 4.42078 |
| 147 | 6 | 32 | 0.268  | 3.11349 |

|     |   |    |        |         |
|-----|---|----|--------|---------|
| 148 | 6 | 33 | 17.334 | 1.76375 |
| 149 | 6 | 34 | 0.655  | 1.83121 |
| 150 | 6 | 35 | 0.233  | 2.9947  |
| 151 | 6 | 36 | 0.168  | 4.41572 |
| 152 | 6 | 37 | 0.117  | 5.81217 |
| 153 | 6 | 42 | 0.242  | 5.42998 |
| 154 | 6 | 43 | 0.224  | 3.78628 |
| 155 | 6 | 44 | 3.3    | 2.04681 |
| 156 | 6 | 45 | 0.555  | 1.52521 |
| 157 | 6 | 46 | 0.296  | 2.793   |
| 158 | 6 | 47 | 0.193  | 3.90065 |
| 159 | 6 | 48 | 0.006  | 5.04118 |
| 160 | 7 | 8  | 0.451  | 1.50666 |
| 161 | 7 | 9  | 12.091 | 3.51955 |
| 162 | 7 | 10 | 0.606  | 5.13554 |
| 163 | 7 | 20 | 0.349  | 5.89988 |
| 164 | 7 | 21 | 0.302  | 4.04572 |
| 165 | 7 | 22 | 0.163  | 2.50095 |
| 166 | 7 | 23 | 3.966  | 1.55201 |
| 167 | 7 | 24 | 0.067  | 1.45564 |
| 168 | 7 | 25 | 0.001  | 2.55337 |
| 169 | 7 | 26 | 0.006  | 2.20505 |
| 170 | 7 | 27 | 0.195  | 1.91515 |
| 171 | 7 | 28 | 22.335 | 1.40273 |
| 172 | 7 | 29 | 0.876  | 2.59073 |
| 173 | 7 | 30 | 0.476  | 4.44408 |
| 174 | 7 | 31 | 0.536  | 5.98571 |
| 175 | 7 | 32 | 0.665  | 4.54154 |
| 176 | 7 | 33 | 0.186  | 2.89333 |
| 177 | 7 | 34 | 1.065  | 2.11225 |
| 178 | 7 | 35 | 2.849  | 2.26068 |
| 179 | 7 | 36 | 0.095  | 3.11897 |
| 180 | 7 | 37 | 0.08   | 4.35802 |
| 181 | 7 | 38 | 0.121  | 5.2875  |
| 182 | 7 | 40 | 0.068  | 5.66852 |
| 183 | 7 | 41 | 0.072  | 4.96221 |
| 184 | 7 | 42 | 0.122  | 3.805   |
| 185 | 7 | 43 | 0.21   | 2.20225 |
| 186 | 7 | 44 | 21.696 | 1.04014 |
| 187 | 7 | 45 | 6.237  | 2.22118 |
| 188 | 7 | 46 | 0.841  | 3.87393 |
| 189 | 7 | 47 | 0.093  | 5.20378 |
| 190 | 8 | 9  | 68.82  | 2.07031 |
| 191 | 8 | 10 | 5.059  | 3.73619 |
| 192 | 8 | 11 | 0.114  | 5.4378  |
| 193 | 8 | 20 | 0.198  | 4.43006 |
| 194 | 8 | 21 | 0.216  | 2.55541 |
| 195 | 8 | 22 | 0.265  | 1.18895 |
| 196 | 8 | 23 | 20.028 | 1.39495 |
| 197 | 8 | 24 | 0.953  | 2.47085 |
| 198 | 8 | 25 | 0.001  | 3.9512  |
| 199 | 8 | 26 | 0.005  | 3.66932 |
| 200 | 8 | 27 | 0.099  | 3.3883  |
| 201 | 8 | 28 | 0.408  | 2.13006 |
| 202 | 8 | 29 | 0.168  | 1.84705 |
| 203 | 8 | 30 | 0.105  | 3.1741  |



|     |    |    |        |         |
|-----|----|----|--------|---------|
| 204 | 8  | 31 | 0.302  | 4.57779 |
| 205 | 8  | 32 | 0.327  | 3.19577 |
| 206 | 8  | 33 | 0.055  | 2.02378 |
| 207 | 8  | 34 | 0.812  | 2.25619 |
| 208 | 8  | 35 | 0.374  | 3.26643 |
| 209 | 8  | 36 | 0.09   | 4.5016  |
| 210 | 8  | 37 | 0.07   | 5.82844 |
| 211 | 8  | 42 | 0.089  | 5.27441 |
| 212 | 8  | 43 | 0.118  | 3.61619 |
| 213 | 8  | 44 | 2.04   | 1.89881 |
| 214 | 8  | 45 | 10.563 | 1.28128 |
| 215 | 8  | 46 | 1.386  | 2.51662 |
| 216 | 8  | 47 | 0.176  | 3.73432 |
| 217 | 8  | 48 | 0.01   | 4.93198 |
| 218 | 9  | 10 | 36.195 | 1.6856  |
| 219 | 9  | 11 | 0.109  | 3.37636 |
| 220 | 9  | 12 | 0.096  | 5.01007 |
| 221 | 9  | 19 | 0.248  | 4.35228 |
| 222 | 9  | 20 | 0.315  | 2.46801 |
| 223 | 9  | 21 | 0.748  | 0.96599 |
| 224 | 9  | 22 | 8.537  | 1.84659 |
| 225 | 9  | 23 | 0.573  | 3.13593 |
| 226 | 9  | 24 | 1.806  | 4.45707 |
| 227 | 9  | 25 | 0.068  | 5.93647 |
| 228 | 9  | 26 | 0.364  | 5.69178 |
| 229 | 9  | 27 | 0.22   | 5.30425 |
| 230 | 9  | 28 | 0.256  | 3.65102 |
| 231 | 9  | 29 | 14.42  | 2.08446 |
| 232 | 9  | 30 | 12.938 | 1.74039 |
| 233 | 9  | 31 | 0.764  | 2.8325  |
| 234 | 9  | 32 | 1.185  | 1.8969  |
| 235 | 9  | 33 | 12.465 | 2.23946 |
| 236 | 9  | 34 | 0.408  | 3.41697 |
| 237 | 9  | 35 | 0.249  | 4.84781 |
| 238 | 9  | 43 | 0.34   | 5.5861  |
| 239 | 9  | 44 | 3.177  | 3.74528 |
| 240 | 9  | 45 | 0.387  | 2.19358 |
| 241 | 9  | 46 | 6.083  | 1.79227 |
| 242 | 9  | 47 | 0.134  | 2.20616 |
| 243 | 9  | 48 | 0.003  | 3.18199 |
| 244 | 10 | 11 | 0.251  | 1.72458 |
| 245 | 10 | 12 | 0.277  | 3.41935 |
| 246 | 10 | 13 | 1.559  | 5.12251 |
| 247 | 10 | 14 | 0.054  | 5.86738 |
| 248 | 10 | 16 | 0.012  | 5.91282 |
| 249 | 10 | 17 | 0.164  | 5.70769 |
| 250 | 10 | 18 | 0.317  | 4.61824 |
| 251 | 10 | 19 | 0.339  | 2.98906 |
| 252 | 10 | 20 | 10.039 | 1.41065 |
| 253 | 10 | 21 | 3.641  | 1.7958  |
| 254 | 10 | 22 | 8.252  | 3.44731 |
| 255 | 10 | 23 | 0.504  | 4.77085 |
| 256 | 10 | 28 | 0.151  | 5.04749 |
| 257 | 10 | 29 | 0.693  | 3.24221 |
| 258 | 10 | 30 | 22.923 | 1.8423  |
| 259 | 10 | 31 | 0.842  | 2.10261 |

|     |    |    |        |         |
|-----|----|----|--------|---------|
| 260 | 10 | 32 | 0.736  | 2.22537 |
| 261 | 10 | 33 | 6.956  | 3.42676 |
| 262 | 10 | 34 | 0.215  | 4.72064 |
| 263 | 10 | 44 | 0.318  | 5.30907 |
| 264 | 10 | 45 | 0.381  | 3.70361 |
| 265 | 10 | 46 | 0.325  | 2.78998 |
| 266 | 10 | 47 | 0.507  | 2.22394 |
| 267 | 10 | 48 | 0.002  | 2.4968  |
| 268 | 11 | 12 | 69.499 | 1.73151 |
| 269 | 11 | 13 | 0.18   | 3.4337  |
| 270 | 11 | 14 | 0.039  | 4.2105  |
| 271 | 11 | 15 | 0.006  | 4.79613 |
| 272 | 11 | 16 | 0.012  | 4.36094 |
| 273 | 11 | 17 | 0.135  | 4.13693 |
| 274 | 11 | 18 | 0.29   | 3.07696 |
| 275 | 11 | 19 | 7.645  | 1.71042 |
| 276 | 11 | 20 | 10.197 | 1.57909 |
| 277 | 11 | 21 | 0.212  | 3.22352 |
| 278 | 11 | 22 | 0.91   | 5.02939 |
| 279 | 11 | 29 | 0.571  | 4.80664 |
| 280 | 11 | 30 | 0.19   | 3.01484 |
| 281 | 11 | 31 | 0.245  | 2.24014 |
| 282 | 11 | 32 | 0.217  | 3.2867  |
| 283 | 11 | 33 | 0.753  | 4.88777 |
| 284 | 11 | 45 | 4.726  | 5.28011 |
| 285 | 11 | 46 | 0.147  | 4.07452 |
| 286 | 11 | 47 | 0.038  | 2.98872 |
| 287 | 11 | 48 | 0.005  | 2.48693 |
| 288 | 12 | 13 | 0.265  | 1.72076 |
| 289 | 12 | 14 | 0.544  | 2.58217 |
| 290 | 12 | 15 | 0.013  | 3.27135 |
| 291 | 12 | 16 | 0.033  | 2.83371 |
| 292 | 12 | 17 | 2.473  | 2.4968  |
| 293 | 12 | 18 | 3.344  | 1.51159 |
| 294 | 12 | 19 | 14.367 | 1.26472 |
| 295 | 12 | 20 | 0.606  | 2.77833 |
| 296 | 12 | 21 | 0.195  | 4.68308 |
| 297 | 12 | 30 | 0.199  | 4.4599  |
| 298 | 12 | 31 | 0.097  | 3.15395 |
| 299 | 12 | 32 | 0.113  | 4.56429 |
| 300 | 12 | 46 | 0.091  | 5.3872  |
| 301 | 12 | 47 | 0.028  | 4.07016 |
| 302 | 12 | 48 | 0.023  | 3.14937 |
| 303 | 13 | 14 | 9.034  | 1.12617 |
| 304 | 13 | 15 | 1.427  | 1.96107 |
| 305 | 13 | 16 | 1.952  | 1.71085 |
| 306 | 13 | 17 | 7.928  | 1.25037 |
| 307 | 13 | 18 | 15.485 | 1.19683 |
| 308 | 13 | 19 | 6.401  | 2.56683 |
| 309 | 13 | 20 | 1.042  | 4.37675 |
| 310 | 13 | 31 | 0.081  | 4.59449 |
| 311 | 13 | 47 | 0.043  | 5.55008 |
| 312 | 13 | 48 | 0.015  | 4.49255 |
| 313 | 14 | 15 | 1.114  | 0.87504 |
| 314 | 14 | 16 | 0.114  | 0.95271 |
| 315 | 14 | 17 | 0.08   | 1.23054 |

|     |    |    |        |         |
|-----|----|----|--------|---------|
| 316 | 14 | 18 | 8.478  | 1.90432 |
| 317 | 14 | 19 | 0.084  | 3.32567 |
| 318 | 14 | 20 | 0.033  | 5.0789  |
| 319 | 14 | 31 | 0.016  | 5.11535 |
| 320 | 14 | 48 | 0.008  | 5.25932 |
| 321 | 15 | 16 | 1.418  | 1.01069 |
| 322 | 15 | 17 | 0.024  | 1.80918 |
| 323 | 15 | 18 | 2.682  | 2.61775 |
| 324 | 15 | 19 | 0.014  | 3.94812 |
| 325 | 15 | 20 | 0.006  | 5.61121 |
| 326 | 15 | 31 | 0.005  | 5.53346 |
| 327 | 15 | 48 | 0.004  | 5.83937 |
| 328 | 16 | 17 | 0.092  | 1.11345 |
| 329 | 16 | 18 | 1.396  | 1.9107  |
| 330 | 16 | 19 | 0.011  | 3.25537 |
| 331 | 16 | 20 | 0.007  | 4.96865 |
| 332 | 16 | 31 | 0.006  | 4.84759 |
| 333 | 16 | 48 | 0.003  | 5.09493 |
| 334 | 17 | 18 | 52.358 | 1.18257 |
| 335 | 17 | 19 | 4.726  | 2.83744 |
| 336 | 17 | 20 | 0.148  | 4.71213 |
| 337 | 17 | 31 | 0.056  | 4.74436 |
| 338 | 17 | 47 | 0.037  | 5.68279 |
| 339 | 17 | 48 | 0.009  | 4.62069 |
| 340 | 18 | 19 | 70.074 | 1.71897 |
| 341 | 18 | 20 | 0.962  | 3.63203 |
| 342 | 18 | 21 | 0.364  | 5.53978 |
| 343 | 18 | 30 | 0.213  | 5.41822 |
| 344 | 18 | 31 | 0.207  | 3.79104 |
| 345 | 18 | 32 | 0.162  | 5.3013  |
| 346 | 18 | 47 | 0.034  | 4.63895 |
| 347 | 18 | 48 | 0.008  | 3.55428 |
| 348 | 19 | 20 | 1.053  | 1.92276 |
| 349 | 19 | 21 | 0.446  | 3.83058 |
| 350 | 19 | 22 | 11.778 | 5.64721 |
| 351 | 19 | 29 | 3.495  | 5.86731 |
| 352 | 19 | 30 | 0.299  | 3.80701 |
| 353 | 19 | 31 | 0.341  | 2.22356 |
| 354 | 19 | 32 | 0.191  | 3.67124 |
| 355 | 19 | 33 | 0.377  | 5.63841 |
| 356 | 19 | 45 | 1.294  | 5.98858 |
| 357 | 19 | 46 | 0.155  | 4.4064  |
| 358 | 19 | 47 | 0.038  | 2.9988  |
| 359 | 19 | 48 | 0.007  | 2.04434 |
| 360 | 20 | 21 | 1.457  | 1.94337 |
| 361 | 20 | 22 | 33.379 | 3.77768 |
| 362 | 20 | 23 | 0.52   | 5.18225 |
| 363 | 20 | 28 | 0.443  | 5.91179 |
| 364 | 20 | 29 | 0.795  | 4.0181  |
| 365 | 20 | 30 | 0.694  | 2.0643  |
| 366 | 20 | 31 | 50.611 | 1.00424 |
| 367 | 20 | 32 | 4.91   | 1.92312 |
| 368 | 20 | 33 | 0.544  | 3.801   |
| 369 | 20 | 34 | 0.353  | 5.36338 |
| 370 | 20 | 44 | 0.481  | 5.9445  |
| 371 | 20 | 45 | 1.584  | 4.09697 |

|     |    |    |        |         |
|-----|----|----|--------|---------|
| 372 | 20 | 46 | 0.536  | 2.62321 |
| 373 | 20 | 47 | 0.066  | 1.43876 |
| 374 | 20 | 48 | 0.003  | 1.39405 |
| 375 | 21 | 22 | 69.497 | 1.84558 |
| 376 | 21 | 23 | 18.368 | 3.29543 |
| 377 | 21 | 24 | 0.098  | 4.73905 |
| 378 | 21 | 27 | 0.262  | 5.87363 |
| 379 | 21 | 28 | 0.571  | 4.27775 |
| 380 | 21 | 29 | 0.346  | 2.6407  |
| 381 | 21 | 30 | 0.665  | 1.6226  |
| 382 | 21 | 31 | 2.838  | 2.18921 |
| 383 | 21 | 32 | 37.178 | 1.26901 |
| 384 | 21 | 33 | 0.173  | 2.36246 |
| 385 | 21 | 34 | 0.482  | 3.83822 |
| 386 | 21 | 35 | 0.545  | 5.35045 |
| 387 | 21 | 44 | 0.62   | 4.15002 |
| 388 | 21 | 45 | 27.453 | 2.32561 |
| 389 | 21 | 46 | 37.503 | 1.09329 |
| 390 | 21 | 47 | 0.114  | 1.28433 |
| 391 | 21 | 48 | 0.005  | 2.46054 |
| 392 | 22 | 23 | 22.771 | 1.54625 |
| 393 | 22 | 24 | 0.327  | 2.98984 |
| 394 | 22 | 25 | 0.001  | 4.81836 |
| 395 | 22 | 26 | 0.005  | 4.53855 |
| 396 | 22 | 27 | 0.115  | 4.35544 |
| 397 | 22 | 28 | 0.397  | 3.13494 |
| 398 | 22 | 29 | 7.824  | 2.31194 |
| 399 | 22 | 30 | 0.79   | 2.79418 |
| 400 | 22 | 31 | 0.846  | 3.84795 |
| 401 | 22 | 32 | 3.316  | 2.46218 |
| 402 | 22 | 33 | 0.417  | 1.92348 |
| 403 | 22 | 34 | 0.477  | 2.85748 |
| 404 | 22 | 35 | 0.149  | 4.0897  |
| 405 | 22 | 36 | 0.094  | 5.38569 |
| 406 | 22 | 43 | 0.123  | 4.40107 |
| 407 | 22 | 44 | 0.346  | 2.6344  |
| 408 | 22 | 45 | 40.304 | 1.13455 |
| 409 | 22 | 46 | 14.711 | 1.51197 |
| 410 | 22 | 47 | 0.296  | 2.80438 |
| 411 | 22 | 48 | 0.216  | 4.08026 |
| 412 | 23 | 24 | 0.049  | 1.50858 |
| 413 | 23 | 25 | 0.001  | 3.60707 |
| 414 | 23 | 26 | 0.005  | 3.27573 |
| 415 | 23 | 27 | 0.168  | 3.10142 |
| 416 | 23 | 28 | 1.339  | 2.32029 |
| 417 | 23 | 29 | 11.199 | 2.49636 |
| 418 | 23 | 30 | 0.472  | 3.79278 |
| 419 | 23 | 31 | 0.189  | 5.10669 |
| 420 | 23 | 32 | 0.228  | 3.59536 |
| 421 | 23 | 33 | 0.362  | 2.1373  |
| 422 | 23 | 34 | 0.454  | 2.12042 |
| 423 | 23 | 35 | 0.067  | 2.90401 |
| 424 | 23 | 36 | 0.063  | 4.02381 |
| 425 | 23 | 37 | 0.051  | 5.35106 |
| 426 | 23 | 41 | 0.04   | 5.80316 |
| 427 | 23 | 42 | 0.062  | 4.62131 |

|     |    |    |       |         |
|-----|----|----|-------|---------|
| 428 | 23 | 43 | 0.096 | 2.96284 |
| 429 | 23 | 44 | 0.212 | 1.35572 |
| 430 | 23 | 45 | 0.38  | 1.24906 |
| 431 | 23 | 46 | 1.708 | 2.76403 |
| 432 | 23 | 47 | 0.086 | 4.23579 |
| 433 | 23 | 48 | 0.027 | 5.55257 |
| 434 | 24 | 25 | 0.001 | 2.41384 |
| 435 | 24 | 26 | 0.002 | 2.01988 |
| 436 | 24 | 27 | 0.023 | 2.01261 |
| 437 | 24 | 28 | 0.087 | 2.27372 |
| 438 | 24 | 29 | 0.133 | 3.44004 |
| 439 | 24 | 30 | 0.118 | 5.11667 |
| 440 | 24 | 32 | 0.044 | 5.02159 |
| 441 | 24 | 33 | 0.05  | 3.31154 |
| 442 | 24 | 34 | 0.708 | 2.49359 |
| 443 | 24 | 35 | 0.024 | 2.31336 |
| 444 | 24 | 36 | 0.024 | 2.85403 |
| 445 | 24 | 37 | 0.019 | 4.02244 |
| 446 | 24 | 38 | 0.02  | 4.90776 |
| 447 | 24 | 39 | 0.015 | 5.65355 |
| 448 | 24 | 40 | 0.016 | 5.21839 |
| 449 | 24 | 41 | 0.017 | 4.3638  |
| 450 | 24 | 42 | 0.017 | 3.20507 |
| 451 | 24 | 43 | 0.012 | 1.64859 |
| 452 | 24 | 44 | 0.019 | 1.19247 |
| 453 | 24 | 45 | 0.035 | 2.60586 |
| 454 | 24 | 46 | 0.098 | 4.24311 |
| 455 | 24 | 47 | 0.026 | 5.71427 |
| 456 | 25 | 26 | 0.023 | 0.82883 |
| 457 | 25 | 27 | 0.487 | 1.66351 |
| 458 | 25 | 28 | 0.002 | 3.14735 |
| 459 | 25 | 29 | 0.002 | 4.90243 |
| 460 | 25 | 33 | 0.001 | 5.20058 |
| 461 | 25 | 34 | 0.002 | 4.02206 |
| 462 | 25 | 35 | 0.011 | 3.08506 |
| 463 | 25 | 36 | 0.013 | 2.41577 |
| 464 | 25 | 37 | 0.002 | 2.75094 |
| 465 | 25 | 38 | 0.001 | 3.52485 |
| 466 | 25 | 39 | 0.001 | 4.19656 |
| 467 | 25 | 40 | 0.001 | 3.62482 |
| 468 | 25 | 41 | 0.001 | 3.02912 |
| 469 | 25 | 42 | 0.002 | 2.18536 |
| 470 | 25 | 43 | 0.199 | 1.81331 |
| 471 | 25 | 44 | 0.002 | 2.8749  |
| 472 | 25 | 45 | 0.001 | 4.57164 |
| 473 | 26 | 27 | 1.664 | 1.16362 |
| 474 | 26 | 28 | 0.01  | 2.81353 |
| 475 | 26 | 29 | 0.008 | 4.61297 |
| 476 | 26 | 33 | 0.007 | 4.88748 |
| 477 | 26 | 34 | 0.009 | 3.67927 |
| 478 | 26 | 35 | 0.025 | 2.71004 |
| 479 | 26 | 36 | 0.309 | 2.11156 |
| 480 | 26 | 37 | 0.01  | 2.66323 |
| 481 | 26 | 38 | 0.008 | 3.51169 |
| 482 | 26 | 39 | 0.006 | 4.2164  |
| 483 | 26 | 40 | 0.006 | 3.66067 |

|     |    |    |         |         |
|-----|----|----|---------|---------|
| 484 | 26 | 41 | 0.009   | 2.98739 |
| 485 | 26 | 42 | 0.02    | 2.00105 |
| 486 | 26 | 43 | 0.564   | 1.3039  |
| 487 | 26 | 44 | 0.006   | 2.48195 |
| 488 | 26 | 45 | 0.005   | 4.2549  |
| 489 | 26 | 46 | 0.021   | 5.9397  |
| 490 | 27 | 28 | 0.971   | 1.95652 |
| 491 | 27 | 29 | 1.24    | 3.91516 |
| 492 | 27 | 33 | 0.405   | 4.29863 |
| 493 | 27 | 34 | 11.562  | 2.86869 |
| 494 | 27 | 35 | 12.199  | 1.68926 |
| 495 | 27 | 36 | 12.468  | 1.37094 |
| 496 | 27 | 37 | 5.177   | 2.46513 |
| 497 | 27 | 38 | 2.35    | 3.39551 |
| 498 | 27 | 39 | 0.688   | 4.21386 |
| 499 | 27 | 40 | 0.738   | 3.85144 |
| 500 | 27 | 41 | 3.186   | 3.21035 |
| 501 | 27 | 42 | 10.64   | 2.08496 |
| 502 | 27 | 43 | 41.98   | 0.917   |
| 503 | 27 | 44 | 35.011  | 1.94764 |
| 504 | 27 | 45 | 0.529   | 3.84402 |
| 505 | 27 | 46 | 1.033   | 5.64131 |
| 506 | 28 | 29 | 102.142 | 2.00602 |
| 507 | 28 | 30 | 26.96   | 4.1551  |
| 508 | 28 | 31 | 1.15    | 5.90133 |
| 509 | 28 | 32 | 2.84    | 4.50849 |
| 510 | 28 | 33 | 1.98    | 2.60714 |
| 511 | 28 | 34 | 23.869  | 1.24932 |
| 512 | 28 | 35 | 8.447   | 1.3753  |
| 513 | 28 | 36 | 0.432   | 2.74411 |
| 514 | 28 | 37 | 0.229   | 4.17757 |
| 515 | 28 | 38 | 0.097   | 5.08376 |
| 516 | 28 | 39 | 0.049   | 5.93774 |
| 517 | 28 | 40 | 0.155   | 5.70091 |
| 518 | 28 | 41 | 0.318   | 5.07467 |
| 519 | 28 | 42 | 0.527   | 3.91359 |
| 520 | 28 | 43 | 2.63    | 2.36973 |
| 521 | 28 | 44 | 59.47   | 1.21298 |
| 522 | 28 | 45 | 18.086  | 2.41257 |
| 523 | 28 | 46 | 1.489   | 4.16748 |
| 524 | 28 | 47 | 0.141   | 5.47126 |
| 525 | 29 | 30 | 48.671  | 2.16797 |
| 526 | 29 | 31 | 34.718  | 3.95677 |
| 527 | 29 | 32 | 11.188  | 2.67107 |
| 528 | 29 | 33 | 0.996   | 1.14339 |
| 529 | 29 | 34 | 0.232   | 1.50795 |
| 530 | 29 | 35 | 0.166   | 3.0102  |
| 531 | 29 | 36 | 0.203   | 4.64989 |
| 532 | 29 | 42 | 0.796   | 5.81704 |
| 533 | 29 | 43 | 1.773   | 4.1717  |
| 534 | 29 | 44 | 19.958  | 2.38201 |
| 535 | 29 | 45 | 20.939  | 1.55098 |
| 536 | 29 | 46 | 6.008   | 2.68271 |
| 537 | 29 | 47 | 3.588   | 3.77384 |
| 538 | 29 | 48 | 0.008   | 4.92769 |
| 539 | 30 | 31 | 85.543  | 1.82484 |

|     |    |    |        |         |
|-----|----|----|--------|---------|
| 540 | 30 | 32 | 63.726 | 0.99779 |
| 541 | 30 | 33 | 12.025 | 1.94261 |
| 542 | 30 | 34 | 6.674  | 3.43993 |
| 543 | 30 | 35 | 3.389  | 5.06669 |
| 544 | 30 | 44 | 0.807  | 4.26651 |
| 545 | 30 | 45 | 1.26   | 2.55704 |
| 546 | 30 | 46 | 25.661 | 1.90322 |
| 547 | 30 | 47 | 9.947  | 2.17974 |
| 548 | 30 | 48 | 0.018  | 3.14438 |
| 549 | 31 | 32 | 1.018  | 1.53642 |
| 550 | 31 | 33 | 4.011  | 3.52897 |
| 551 | 31 | 34 | 0.624  | 5.1627  |
| 552 | 31 | 44 | 0.329  | 5.85704 |
| 553 | 31 | 45 | 0.442  | 3.96656 |
| 554 | 31 | 46 | 0.272  | 2.47624 |
| 555 | 31 | 47 | 2.901  | 1.54966 |
| 556 | 31 | 48 | 0.403  | 1.87535 |
| 557 | 32 | 33 | 61.001 | 2.06571 |
| 558 | 32 | 34 | 16.025 | 3.74049 |
| 559 | 32 | 35 | 13.839 | 5.36457 |
| 560 | 32 | 44 | 0.607  | 4.35289 |
| 561 | 32 | 45 | 1.606  | 2.44643 |
| 562 | 32 | 46 | 0.544  | 1.15229 |
| 563 | 32 | 47 | 11.484 | 1.44203 |
| 564 | 32 | 48 | 0.125  | 2.64685 |
| 565 | 33 | 34 | 0.625  | 1.6918  |
| 566 | 33 | 35 | 0.348  | 3.31317 |
| 567 | 33 | 36 | 0.255  | 4.96018 |
| 568 | 33 | 43 | 0.371  | 4.32106 |
| 569 | 33 | 44 | 0.471  | 2.45144 |
| 570 | 33 | 45 | 10.731 | 0.97636 |
| 571 | 33 | 46 | 3.958  | 1.96215 |
| 572 | 33 | 47 | 4.278  | 3.26989 |
| 573 | 33 | 48 | 0.405  | 4.55638 |
| 574 | 34 | 35 | 0.79   | 1.64685 |
| 575 | 34 | 36 | 0.443  | 3.34686 |
| 576 | 34 | 37 | 0.51   | 4.88467 |
| 577 | 34 | 38 | 0.403  | 5.76317 |
| 578 | 34 | 41 | 0.21   | 5.72765 |
| 579 | 34 | 42 | 0.488  | 4.53735 |
| 580 | 34 | 43 | 7.23   | 2.93556 |
| 581 | 34 | 44 | 14.643 | 1.38172 |
| 582 | 34 | 45 | 8.555  | 1.81806 |
| 583 | 34 | 46 | 1.011  | 3.52568 |
| 584 | 34 | 47 | 0.514  | 4.89162 |
| 585 | 35 | 36 | 48.533 | 1.74049 |
| 586 | 35 | 37 | 1.778  | 3.28327 |
| 587 | 35 | 38 | 0.174  | 4.14304 |
| 588 | 35 | 39 | 0.026  | 4.99755 |
| 589 | 35 | 40 | 0.048  | 4.8754  |
| 590 | 35 | 41 | 0.253  | 4.21123 |
| 591 | 35 | 42 | 0.255  | 3.06996 |
| 592 | 35 | 43 | 2.661  | 1.73749 |
| 593 | 35 | 44 | 6.793  | 1.58676 |
| 594 | 35 | 45 | 0.349  | 3.20926 |
| 595 | 35 | 46 | 1.05   | 5.0327  |

|     |    |    |        |         |
|-----|----|----|--------|---------|
| 596 | 36 | 37 | 82.511 | 1.55138 |
| 597 | 36 | 38 | 0.311  | 2.42869 |
| 598 | 36 | 39 | 0.041  | 3.28898 |
| 599 | 36 | 40 | 0.066  | 3.1487  |
| 600 | 36 | 41 | 0.402  | 2.53341 |
| 601 | 36 | 42 | 6.272  | 1.50949 |
| 602 | 36 | 43 | 3.088  | 1.29266 |
| 603 | 36 | 44 | 1.59   | 2.77502 |
| 604 | 36 | 45 | 0.285  | 4.68144 |
| 605 | 37 | 38 | 8.365  | 0.94399 |
| 606 | 37 | 39 | 1.073  | 1.82176 |
| 607 | 37 | 40 | 0.531  | 1.65835 |
| 608 | 37 | 41 | 3.969  | 1.29772 |
| 609 | 37 | 42 | 3.256  | 1.12448 |
| 610 | 37 | 43 | 0.43   | 2.41174 |
| 611 | 37 | 44 | 0.431  | 4.19524 |
| 612 | 38 | 39 | 0.104  | 0.95919 |
| 613 | 38 | 40 | 0.436  | 1.09773 |
| 614 | 38 | 41 | 1.498  | 1.26418 |
| 615 | 38 | 42 | 2.226  | 1.82715 |
| 616 | 38 | 43 | 1.065  | 3.3145  |
| 617 | 38 | 44 | 0.851  | 5.11477 |
| 618 | 39 | 40 | 4.197  | 0.89083 |
| 619 | 39 | 41 | 1.564  | 1.59492 |
| 620 | 39 | 42 | 0.629  | 2.5102  |
| 621 | 39 | 43 | 0.433  | 4.10042 |
| 622 | 39 | 44 | 0.273  | 5.93457 |
| 623 | 40 | 41 | 3.825  | 1.0315  |
| 624 | 40 | 42 | 2.769  | 2.08683 |
| 625 | 40 | 43 | 0.242  | 3.73676 |
| 626 | 40 | 44 | 0.313  | 5.61278 |
| 627 | 41 | 42 | 14.881 | 1.22155 |
| 628 | 41 | 43 | 0.985  | 2.92954 |
| 629 | 41 | 44 | 0.28   | 4.83764 |
| 630 | 42 | 43 | 70.754 | 1.71484 |
| 631 | 42 | 44 | 0.619  | 3.62667 |
| 632 | 42 | 45 | 0.206  | 5.54581 |
| 633 | 43 | 44 | 0.841  | 1.91735 |
| 634 | 43 | 45 | 0.305  | 3.8395  |
| 635 | 43 | 46 | 0.495  | 5.63309 |
| 636 | 44 | 45 | 1.009  | 1.94795 |
| 637 | 44 | 46 | 13.447 | 3.77456 |
| 638 | 44 | 47 | 0.107  | 5.22822 |
| 639 | 45 | 46 | 33.545 | 1.84665 |
| 640 | 45 | 47 | 0.414  | 3.3115  |
| 641 | 45 | 48 | 0.106  | 4.642   |
| 642 | 46 | 47 | 0.382  | 1.53726 |
| 643 | 46 | 48 | 0.117  | 2.9303  |
| 644 | 47 | 48 | 0.036  | 1.48032 |



## Supplemental References

1. Abraham, M. J., T. Murtola, R. Schulz, S. Páll, J. C. Smith, B. Hess, and E. Lindahl. 2015. GROMACS: High performance molecular simulations through multi-level parallelism from laptops to supercomputers. *SoftwareX*. 1-2:19-25.
2. Jo, S., T. Kim, and W. Im. 2007. Automated builder and database of protein/membrane complexes for molecular dynamics simulations. *PLoS One*. 2:e880.
3. Jo, S., T. Kim, V. G. Iyer, and W. Im. 2008. CHARMM-GUI: a web-based graphical user interface for CHARMM. *J Comput Chem*. 29:1859-1865.
4. Jo, S., J. B. Lim, J. B. Klauda, and W. Im. 2009. CHARMM-GUI Membrane Builder for mixed bilayers and its application to yeast membranes. *Biophys J*. 97:50-58.
5. Lee, J., X. Cheng, J. M. Swails, M. S. Yeom, P. K. Eastman, J. A. Lemkul, S. Wei, J. Buckner, J. C. Jeong, Y. Qi, S. Jo, V. S. Pande, D. A. Case, C. L. Brooks, 3rd, A. D. MacKerell, Jr., J. B. Klauda, and W. Im. 2016. CHARMM-GUI Input Generator for NAMD, GROMACS, AMBER, OpenMM, and CHARMM/OpenMM Simulations Using the CHARMM36 Additive Force Field. *J Chem Theory Comput*. 12:405-413.
6. Wu, E. L., X. Cheng, S. Jo, H. Rui, K. C. Song, E. M. Davila-Contreras, Y. Qi, J. Lee, V. Monje-Galvan, R. M. Venable, J. B. Klauda, and W. Im. 2014. CHARMM-GUI Membrane Builder toward realistic biological membrane simulations. *J Comput Chem*. 35:1997-2004.
7. de Groot, J. C., K. Schluter, Y. Carius, C. Quedenau, D. Vingadassalom, J. Faix, S. M. Weiss, J. Reichelt, C. Standfuss-Gabisch, C. F. Lesser, J. M. Leong, D. W. Heinz, K. Bussow, and T. E. Stradal. 2011. Structural basis for complex formation between human IRSp53 and the translocated intimin receptor Tir of enterohemorrhagic E. coli. *Structure*. 19:1294-1306.
8. Parrinello, M., and A. Rahman. 1981. Polymorphic Transitions in Single-Crystals - a New Molecular-Dynamics Method. *Journal of Applied Physics*. 52:7182-7190.
9. Smit, B., and D. Frenkel. 2001. Understanding Molecular Simulation: From Algorithms to Applications. Elsevier.
10. Best, R. B., X. Zhu, J. Shim, P. E. Lopes, J. Mittal, M. Feig, and A. D. Mackerell, Jr. 2012. Optimization of the additive CHARMM all-atom protein force field targeting improved sampling of the backbone phi, psi and side-chain chi(1) and chi(2) dihedral angles. *J Chem Theory Comput*. 8:3257-3273.
11. Klauda, J. B., R. M. Venable, J. A. Freites, J. W. O'Connor, D. J. Tobias, C. Mondragon-Ramirez, I. Vorobyov, A. D. MacKerell, Jr., and R. W. Pastor. 2010. Update of the CHARMM all-atom additive force field for lipids: validation on six lipid types. *J Phys Chem B*. 114:7830-7843.
12. MacKerell, A. D., D. Bashford, M. Bellott, R. L. Dunbrack, J. D. Evanseck, M. J. Field, S. Fischer, J. Gao, H. Guo, S. Ha, D. Joseph-McCarthy, L. Kuchnir, K. Kuczera, F. T. Lau, C. Mattos, S. Michnick, T. Ngo, D. T. Nguyen, B. Prodhom, W. E. Reiher, B. Roux, M. Schlenkrich, J. C. Smith, R. Stote, J. Straub, M. Watanabe, J. Wiorkiewicz-Kuczera, D. Yin, and M. Karplus. 1998. All-atom empirical potential for molecular modeling and dynamics studies of proteins. *J Phys Chem B*. 102:3586-3616.
13. Zhang, Z., L. Lu, W. G. Noid, V. Krishna, J. Pfandtner, and G. A. Voth. 2008. A systematic methodology for defining coarse-grained sites in large biomolecules. *Biophys J*. 95:5073-5083.

14. Srivastava, A., and G. A. Voth. 2013. A Hybrid Approach for Highly Coarse-grained Lipid Bilayer Models. *J Chem Theory Comput.* 9:750-765.
15. Lyman, E., J. Pfandner, and G. A. Voth. 2008. Systematic multiscale parameterization of heterogeneous elastic network models of proteins. *Biophys J.* 95:4183-4192.
16. Allen, M. P., and D. J. Tildesley. 1989. Computer simulation of liquids. Clarendon Press, Oxford.
17. Plimpton, S. 1995. Fast Parallel Algorithms for Short-Range Molecular Dynamics. *Journal of Computational Physics.* 117:1-19.
18. Dunweg, B., and W. Paul. 1991. Brownian Dynamics Simulations without Gaussian Random Numbers. *International Journal of Modern Physics C.* 2:817-827.
19. Davtyan, A., M. Simunovic, and G. A. Voth. 2017. The mesoscopic membrane with proteins (MesM-P) model. *The Journal of Chemical Physics.* 147:044101.
20. Böckmann, R. A., A. Hac, T. Heimburg, and H. Grubmüller. 2003. Effect of Sodium Chloride on a Lipid Bilayer. *Biophysical Journal.* 85:1647-1655.
21. Pandit, S. A., D. Bostick, and M. L. Berkowitz. 2003. Mixed Bilayer Containing Dipalmitoylphosphatidylcholine and Dipalmitoylphosphatidylserine: Lipid Complexation, Ion Binding, and Electrostatics. *Biophysical Journal.* 85:3120-3131.
